# Supplementary material for: A Pathogenic Presenilin-1 Val96Phe Mutation from a Malaysian Family
Source: MDPI journal article supplement (doi:10.3390/brainsci11101328), 2021-10-08
Supplement: s1 [file s1]

# Supplementary Materials

**Table S1.** Genes, involved in the gene panel.

| Dx            | No | Genes, involved in the gene panel                                                                                                                                                                                                                                            |
|---------------|----|------------------------------------------------------------------------------------------------------------------------------------------------------------------------------------------------------------------------------------------------------------------------------|
| AD            | 40 | ABCA7, ACE, ADAM10, APP, BACE1, BIN1, CASS4, CD2AP, CD33, CDH12, CDH18, CR1, CTNNA3, CLU, DNMBP, EPHA1, DSG2, HLA-DRB5, HLA-DRB1, INPP5D, LPR6, MEF2C, MTHFD1L, MS4A4A, MS4A6E, NME8, PICALM, PSEN1, PSEN2, PLD3, PTK2B, RIN3, S100A9, SLC24A4, SORL1, TM2D3, TOMM40, ZCWPW1 |
| PD            | 22 | ACMSD, BST1, FBXO7, FGF20, GAK, GBA, GIGYF2, GPNMB, HIP1R, LAMP3, LRRK2, PARK2, PARK7, PARK9, PINK1, PLA2G6, SNCA, STBD1, STK39, STX1B, SYT11, VPS35                                                                                                                         |
| ALS & FTD     | 30 | ANG, ALS2, ATXN1, ATXN2, CHMP2B, CCNF, DAO, DCTN1, EWSR1, FIG4, FUS, GRN, HNRNPA1, HNRNPA2B1, MAPT, NEK1, OPTN, PFN1, PPT1, SETX, SIGMAR1, SOD1, SQSTM1, TAF15, TARDBP, TMEM106B, TBK1, UBQLN2, VAPB, VCP                                                                    |
| Other disease | 8  | CTSA, CYP7B1, CSF1R, HTRA1, NOTCH3, SPAST, SPG11, PRNP                                                                                                                                                                                                                       |

**Table S2. (a).** Variants, found in III-3 **(b).** variants found in III-4.

**a.**

| Gene    | Mutation     | RsID        | 1000g_eas | 1000g_all | ExAC_ALL | ExAC_EAS | SIFT    | Polyphen2 |
|---------|--------------|-------------|-----------|-----------|----------|----------|---------|-----------|
| ABCA7   | E188G        | rs3764645   | 0.4355    | 0.399561  | 0.4838   | 0.4379   | 0.647,T | 0.358,B   |
|         | R1349Q       | rs3745842   | 0.3482    | 0.390575  | 0.4433   | 0.3601   | 0.546,T | 0.008,B   |
|         | G1527A       | rs3752246   | 0.6478    | 0.825479  | 0.8405   | 0.6552   | 0.877,T | 0.0,B     |
|         | A2045S       | rs4147934   | 0.4325    | 0.605032  | 0.7317   | 0.544    | 0.962,T | 0.057,B   |
| ALS2    | V368M        | rs3219156   | 1         | 0.896565  | 0.9106   | 0.9999   | 0.191,T | 0.006,B   |
| ATP13A2 | A1072T       | rs3170740   | 0.246     | 0.33127   | 0.5065   | 0.3343   | 1.0,T   | 0.001,B   |
| ATXN1   | Q215H        | rs184327938 | NA        | NA        | 0.0004   | 0.005    | 0.316,T | 0.0,B     |
|         | Q213H        | rs3817753   | NA        | NA        | 0.0031   | 0.0081   | 0.072,T | 0.0,B     |
|         | H211Q        | rs59310777  | 0.3879    | 0.266374  | 0.0636   | 0.1175   | 0.297,T | 0.0,B     |
| ATXN2   | S248N        | rs7969300   | 0.5228    | 0.179513  | 0.0905   | 0.5838   | 0.136,T | 0.0,B     |
|         | p.188_189del | rs10560189  | 1         | 0.951078  | 0.5912   | 0.53     | NA      | NA        |
| BACE1   | C412R        | rs539765    | 1         | 1         | 0.9997   | 1        | 1.0,T   | 0.0,B     |
| CR1     | H1658R       | rs2274567   | 0.3274    | 0.294329  | 0.251    | 0.2821   | 0.897,T | 0.995,D   |
|         | T1858M       | rs3737002   | 0.3264    | 0.248802  | 0.275    | 0.3408   | 0.021,D | 1.0,D     |
|         | T2060S       | rs4844609   | 1         | 0.995008  | 0.9853   | 1        | 1.0,T   | 0.003,B   |
|         | I2065V       | rs6691117   | 0.3433    | 0.493411  | 0.3341   | 0.3014   | 1.0,T   | 0.001,B   |
|         | P2277R       | rs3811381   | 0.3224    | 0.26278   | 0.2403   | 0.278    | 0.446,T | 0.643,P   |
|         | T2419A       | rs2296160   | 0.6885    | 0.828075  | 0.8159   | 0.6571   | 1.0,T   | 0.0,B     |
| CSF1R   | H362R        | rs10079250  | 0.381     | 0.153355  | 0.1192   | 0.3644   | 0.061,T | 0.255,B   |
| CTNNA3  | S596N        | rs4548513   | 0.4187    | 0.485024  | 0.412    | 0.4324   | 1.0,T   | 0.0,B     |
| CTSA    | p.29_29del   | rs10582052  | 0.5784    | 0.649361  | 0.6432   | 0.6281   | NA      | NA        |
| DSG2    | R773K        | rs2278792   | 0.4643    | 0.240016  | 0.2676   | 0.4748   | 0.383,T | 0.026,B   |
| EPHA1   | M900V        | rs6967117   | 1         | 0.960264  | 0.9366   | 0.9988   | 1.0,T   | 0.0,B     |
|         | Q494H        | rs375144213 | NA        | NA        | 5.77E-05 | 0        | 0.497,T | 0.996,D   |
|         | V160A        | rs4725617   | 0.9921    | 0.94349   | 0.9284   | 0.9914   | 0.246,T | 0.0,B     |
| FBXO7   | M115I        | rs111107    | 0.6915    | 0.48742   | 0.44     | 0.6908   | 1.0,T   | 0.0,B     |
| FGF20   | G116R        | rs3793405   | 0.0179    | 0.0039936 | 0.0014   | 0.0156   | 0.001,D | 0.994,D   |
| FIG4    | V654A        | rs9885672   | 0.4077    | 0.447883  | 0.2753   | 0.4072   | 0.833,T | 0.0,B     |
| GIGYF2  | P460T        | rs2289912   | 0.2302    | 0.0830671 | 0.0524   | 0.2291   | 0.375,T | 0.756,P   |

|         |                    |             |        |           |           |        |         |         |
|---------|--------------------|-------------|--------|-----------|-----------|--------|---------|---------|
|         | p.P1210fs          | rs371622656 | NA     | NA        | 0.0688    | 0.2392 | NA      | NA      |
|         | p.1210_1211<br>del | rs10555297  | 0.6022 | 0.559105  | 0.5753    | 0.5611 | NA      | NA      |
|         | p.P1210fs          | rs775324034 | NA     | NA        | 0.174     | 0.3959 | NA      | NA      |
| LAMP3   | I318V              | rs482912    | 0.4712 | 0.496406  | 0.6483    | 0.5081 | 1.0,T   | 0.0,B   |
| LRP6    | V1062I             | rs2302685   | 0.9196 | 0.885583  | 0.8474    | 0.9296 | 1.0,T   | 0.0,B   |
| LRRK2   | R50H               | rs2256408   | 1      | 0.969249  | 0.9911    | 1      | 1.0,T   | 0.0,B   |
|         | S1647T             | rs11564148  | 0.3373 | 0.285942  | 0.2983    | 0.3341 | 0.953,T | 0.0,B   |
| MAPT    | Y441H              | rs2258689   | 0.628  | 0.312899  | 0.2752    | 0.6411 | 0.978,T | 0.001,B |
| MS4A4A  | K33E               | rs10750931  | 0.1349 | 0.154553  | 0.1435    | 0.1143 | 0.084,T | 0.583,P |
|         | M159V              | rs6591561   | 0.3849 | 0.329073  | 0.2965    | 0.3701 | 0.837,T | 0.0,B   |
| NME8    | C208R              | rs10250905  | 0.5466 | 0.743411  | 0.7383    | 0.5651 | 0.046,D | 0.001,B |
| NOTCH3  | A2223V             | rs1044009   | 0.5724 | 0.629393  | 0.7591    | 0.6421 | 0.175,T | 0.001,B |
| OPTN    | M98K               | rs11258194  | 0.1359 | 0.0786741 | 0.0452    | 0.1193 | 0.925,T | 0.001,B |
|         | K322E              | rs523747    | 1      | 0.993411  | 0.9973    | 1      | 1.0,T   | 0.0,B   |
| PINK1   | N521T              | rs1043424   | 0.3571 | 0.300519  | 0.2974    | 0.3596 | 0.247,T | 0.022,B |
| PSEN1   | V96F               | rs63750601  | NA     | NA        | NA        | NA     | 0.002,D | 1.0,D   |
| RIN3    | H215R              | rs3829947   | 0.2748 | 0.442492  | 0.4877    | 0.2729 | 0.222,T | 0.0,B   |
|         | T425M              | rs3742717   | 0.4415 | 0.292532  | 0.2385    | 0.4625 | 0.08,T  | 0.293,B |
|         | p.967_967del       | rs570458246 | NA     | NA        | 0.6674    | 0.7923 | NA      | NA      |
| SETX    | S2612G             | rs3739927   | 0.3591 | 0.163538  | 0.0852    | 0.3901 | 0.751,T | 0.0,B   |
|         | I2587V             | rs1056899   | 0.6835 | 0.538738  | 0.3926    | 0.733  | 1.0,T   | 0.0,B   |
|         | T1855A             | rs2296871   | 0.6379 | 0.443091  | 0.2758    | 0.7029 | 0.984,T | 0.0,B   |
|         | I1386V             | rs543573    | 0.3621 | 0.55611   | 0.7252    | 0.2984 | 0.872,T | 0.0,B   |
|         | G1252R             | rs1183768   | 0.3621 | 0.55611   | 0.7251    | 0.2982 | 0.133,T | 0.796,P |
|         | D1192E             | rs1185193   | 0.3681 | 0.640575  | 0.7635    | 0.3062 | 0.377,T | 0.004,B |
|         | A660G              | rs882709    | 0.4117 | 0.213658  | 0.1211    | 0.4524 | 0.008,D | 0.728,P |
| SIGMAR1 | R208W              | rs11559048  | 0.0268 | 0.0129792 | 0.0078    | 0.0289 | 0.014,D | 1.0,D   |
| SORL1   | Q1074E             | rs1699107   | 1      | 0.984824  | 0.9949    | 1      | 1.0,T   | 0.0,B   |
|         | V1967I             | rs1792120   | 1      | 0.979433  | 0.9953    | 1      | 1.0,T   | 0.0,B   |
| SPG11   | M2132T             | rs771913148 | NA     | NA        | 5.054E-05 | 0.0007 | 0.002,D | 1.0,D   |
| SYT11   | Q48H               | rs822522    | 1      | 0.954673  | 0.988     | 1      | 0.866,T | 0.0,B   |
| TM2D3   | L6R                | rs2939587   | 1      | 0.993411  | 0.9798    | 0.9999 | 0.466,T | 0.0,B   |

b.

| Gene    | Mutation     | RsID        | 1000g_eas | 1000g_all | ExAC_ALL | ExAC_EAS | SIFT    | Polyphen2 |
|---------|--------------|-------------|-----------|-----------|----------|----------|---------|-----------|
| ALS2    | V368M        | rs3219156   | 1         | 0.896565  | 0.9106   | 0.9999   | 0.191,T | 0.006,B   |
| ATP13A2 | A1072T       | rs3170740   | 0.246     | 0.33127   | 0.5065   | 0.3343   | 1.0,T   | 0.001,B   |
| ATXN1   | Q213H        | rs3817753   | NA        | NA        | 0.0031   | 0.0081   | 0.072,T | 0.0,B     |
|         | H211Q        | rs59310777  | 0.3879    | 0.266374  | 0.0636   | 0.1175   | 0.297,T | 0.0,B     |
|         | p.224_226del | rs754954093 | NA        | NA        | 0.0042   | 0.0275   | NA      | NA        |
| ATXN2   | S248N        | rs7969300   | 0.5228    | 0.179513  | 0.0905   | 0.5838   | 0.136,T | 0.0,B     |
|         | S220F        | rs562996744 | 0.001     | 0.0002    | NA       | NA       | 0.007,D | 0.842,P   |
|         | p.188_189del | rs10560189  | 1         | 0.951078  | 0.5912   | 0.53     | NA      | NA        |
| BACE1   | C412R        | rs539765    | 1         | 1         | 0.9997   | 1        | 1.0,T   | 0.0,B     |
| BST1    | R145Q        | rs2302464   | 0.2232    | 0.079074  | 0.0485   | 0.2057   | 0.118,T | 1.0,D     |
| CASS4   | P660S        | rs35031530  | 0.2381    | 0.146765  | 0.0536   | 0.2591   | 0.286,T | 0.001,B   |
| CD33    | A14V         | rs12459419  | 0.1855    | 0.210663  | 0.2939   | 0.1792   | 0.083,T | 0.766,P   |
| CDH12   | V68M         | rs4371716   | 0.1438    | 0.36222   | 0.2988   | 0.1522   | 0.468,T | 0.0,B     |
| CR1     | H1658R       | rs2274567   | 0.3274    | 0.294329  | 0.251    | 0.2821   | 0.897,T | 0.995,D   |
|         | T1858M       | rs3737002   | 0.3264    | 0.248802  | 0.275    | 0.3408   | 0.021,D | 1.0,D     |

|          |                |             |        |          |          |        |         |         |
|----------|----------------|-------------|--------|----------|----------|--------|---------|---------|
|          | T2060S         | rs4844609   | 1      | 0.995008 | 0.9853   | 1      | 1.0,T   | 0.003,B |
|          | I2065V         | rs6691117   | 0.3433 | 0.493411 | 0.3341   | 0.3014 | 1.0,T   | 0.001,B |
|          | P2277R         | rs3811381   | 0.3224 | 0.26278  | 0.2403   | 0.278  | 0.446,T | 0.643,P |
|          | T2419A         | rs2296160   | 0.6885 | 0.828075 | 0.8159   | 0.6571 | 1.0,T   | 0.0,B   |
| CSF1R    | H362R          | rs10079250  | 0.381  | 0.153355 | 0.1192   | 0.3644 | 0.061,T | 0.255,B |
| CTNNA3   | S596N          | rs4548513   | 0.4187 | 0.485024 | 0.412    | 0.4324 | 1.0,T   | 0.0,B   |
| CTSA     | p.29_29del     | rs10582052  | 0.5784 | 0.649361 | 0.6432   | 0.6281 | NA      | NA      |
| DSG2     | R773K          | rs2278792   | 0.4643 | 0.240016 | 0.2676   | 0.4748 | 0.383,T | 0.026,B |
|          | M900V          | rs6967117   | 1      | 0.960264 | 0.9366   | 0.9988 | 1.0,T   | 0.0,B   |
| EPHA1    | Q494H          | rs375144213 | NA     | NA       | 5.77E-05 | NA     | 0.497,T | 0.996,D |
|          | V160A          | rs4725617   | 0.9921 | 0.94349  | 0.9284   | 0.9914 | 0.246,T | 0.0,B   |
|          | G6E            | rs9621461   | 0.0615 | 0.065096 | 0.0888   | 0.0524 | 0.7,T   | 0.001,B |
| FBXO7    | M115I          | rs111107    | 0.6915 | 0.48742  | 0.44     | 0.6908 | 1.0,T   | 0.0,B   |
| FGF20    | G116R          | rs3793405   | 0.0179 | 0.003994 | 0.0014   | 0.0156 | 0.001,D | 0.994,D |
| FIG4     | V654A          | rs9885672   | 0.4077 | 0.447883 | 0.2753   | 0.4072 | 0.833,T | 0.0,B   |
|          | P460T          | rs2289912   | 0.2302 | 0.083067 | 0.0524   | 0.2291 | 0.375,T | 0.756,P |
| GIGYF2   | p.1210_1211del | rs10555297  | 0.6022 | 0.559105 | 0.5753   | 0.5611 | NA      | NA      |
| GPNMB    | S294F          | rs35499907  | 0.13   | 0.039337 | 0.0123   | 0.1208 | 0.003,D | 1.0,D   |
| HIP1R    | V782M          | rs2271051   | 0.2262 | 0.158546 | 0.0988   | 0.237  | 0.53,T  | 0.0,B   |
| LAMP3    | I318V          | rs482912    | 0.4712 | 0.496406 | 0.6483   | 0.5081 | 1.0,T   | 0.0,B   |
| LRP6     | V1062I         | rs2302685   | 0.9196 | 0.885583 | 0.8474   | 0.9296 | 1.0,T   | 0.0,B   |
|          | R50H           | rs2256408   | 1      | 0.969249 | 0.9911   | 1      | 1.0,T   | 0.0,B   |
| LRRK2    | S1647T         | rs11564148  | 0.3373 | 0.285942 | 0.2983   | 0.3341 | 0.953,T | 0.0,B   |
|          | M2397T         | rs3761863   | 0.4603 | 0.551717 | 0.624    | 0.4731 | 0.466,T | 0.0,B   |
| MAPT     | Y441H          | rs2258689   | 0.628  | 0.312899 | 0.2752   | 0.6411 | 0.978,T | 0.001,B |
| MS4A4A   | M159V          | rs6591561   | 0.3849 | 0.329073 | 0.2965   | 0.3701 | 0.837,T | 0.0,B   |
|          | R43K           | rs2722372   | 0.1815 | 0.245208 | 0.2301   | 0.1922 | 1.0,T   | 0.0,B   |
| NME8     | C208R          | rs10250905  | 0.5466 | 0.743411 | 0.7383   | 0.5651 | 0.046,D | 0.001,B |
| NOTCH3   | A2223V         | rs1044009   | 0.5724 | 0.629393 | 0.7591   | 0.6421 | 0.175,T | 0.001,B |
|          | M98K           | rs11258194  | 0.1359 | 0.078674 | 0.0452   | 0.1193 | 0.925,T | 0.001,B |
| OPTN     | K322E          | rs523747    | 1      | 0.993411 | 0.9973   | 1      | 1.0,T   | 0.0,B   |
| PINK1    | N521T          | rs1043424   | 0.3571 | 0.300519 | 0.2974   | 0.3596 | 0.247,T | 0.022,B |
| PSEN1    | V96F           | rs63750601  | NA     | NA       | NA       | NA     | 0.002,D | 1.0,D   |
|          | T425M          | rs3742717   | 0.4415 | 0.292532 | 0.2385   | 0.4625 | 0.08,T  | 0.293,B |
| RIN3     | R599H          | rs200221185 | 0.001  | 0.0002   | 0.0002   | 0.0023 | 0.002,D | 1.0,D   |
|          | S2612G         | rs3739927   | 0.3591 | 0.163538 | 0.0852   | 0.3901 | 0.751,T | 0.0,B   |
|          | I2587V         | rs1056899   | 0.6835 | 0.538738 | 0.3926   | 0.733  | 1.0,T   | 0.0,B   |
|          | T1855A         | rs2296871   | 0.6379 | 0.443091 | 0.2758   | 0.7029 | 0.984,T | 0.0,B   |
| SETX     | I1386V         | rs543573    | 0.3621 | 0.55611  | 0.7252   | 0.2984 | 0.872,T | 0.0,B   |
|          | G1252R         | rs1183768   | 0.3621 | 0.55611  | 0.7251   | 0.2982 | 0.133,T | 0.796,P |
|          | D1192E         | rs1185193   | 0.3681 | 0.640575 | 0.7635   | 0.3062 | 0.377,T | 0.004,B |
|          | A660G          | rs882709    | 0.4117 | 0.213658 | 0.1211   | 0.4524 | 0.008,D | 0.728,P |
|          | Q1074E         | rs1699107   | 1      | 0.984824 | 0.9949   | 1      | 1.0,T   | 0.0,B   |
| SORL1    | V1967I         | rs1792120   | 1      | 0.979433 | 0.9953   | 1      | 1.0,T   | 0.0,B   |
|          | K1534R         | rs377348534 | NA     | NA       | 1.65E-05 | 0      | 0.965,T | 0.002,B |
| SPG11    | F463S          | rs3759871   | 0.4653 | 0.47484  | 0.4659   | 0.4674 | 0.343,T | 0.066,B |
| STBD1    | p.T276fs       | rs762797442 | NA     | NA       | 0.0001   | 0.0007 | NA      | NA      |
| SYT11    | Q48H           | rs822522    | 1      | 0.954673 | 0.988    | 1      | 0.866,T | 0.0,B   |
| TM2D3    | L6R            | rs2939587   | 1      | 0.993411 | 0.9798   | 0.9999 | 0.466,T | 0.0,B   |
| TMEM106B | T185S          | rs3173615   | 0.6508 | 0.595048 | 0.4916   | 0.6538 | 0.214,T | 0.043,B |

62 62 62 62 62 62 62 62 62 62 59 59 59 59 59 62 62 62 62 62 62 62 62 62 49 49 49 62 24 35 13 24 24 62  
 C T T T G T C C C T G T G A C T C T G C A T G G T G G T G G T G G T C G

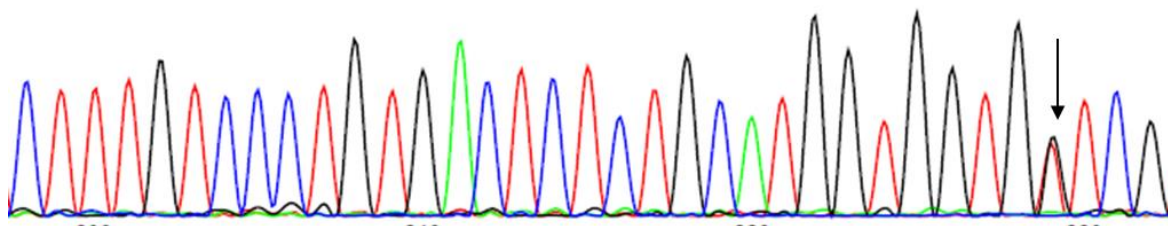

DNA240/18

62 62 62 62 62 62 62 62 62 62 59 59 59 59 59 62 62 62 62 62 62 62 62 62 49 49 49 62 24 35 13 24 24 62  
 C T T T G T C C C T G T G A C T C T G C A T G G T G G T G G T C G

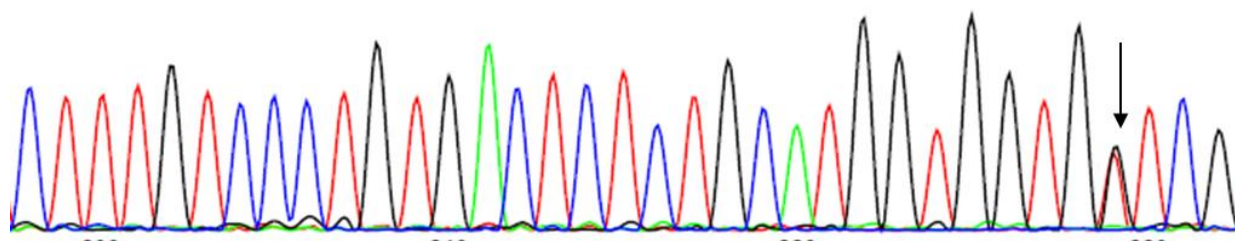

427/19: III-5

427/19

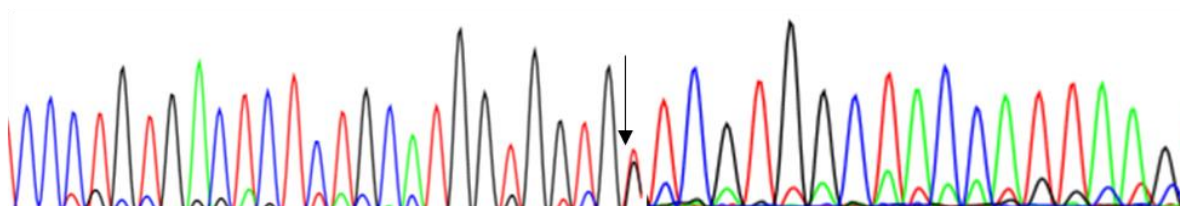

426/16 III-6

426/19

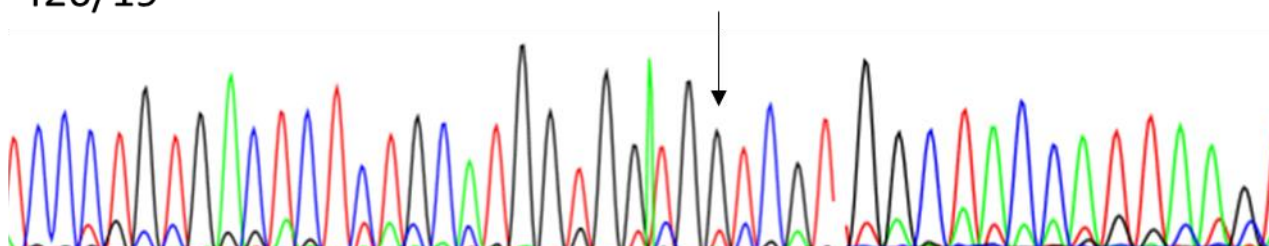

Figure S1. Sequencing data of family members.
